# Supplementary material for: The Anti-Tumor Effects of M1 Macrophage-Loaded Poly (ethylene glycol) and Gelatin-Based Hydrogels on Hepatocellular Carcinoma
Source: PubMed Central journal article supplement — Theranostics. 2017 Aug 23;7(15):3732–44. doi: 10.7150/thno.20251 (PMC5667344; doi:10.7150/thno.20251), 2017-08-23
Supplement: thnov07p3732s1.pdf [file thnov07p3732s1.pdf]

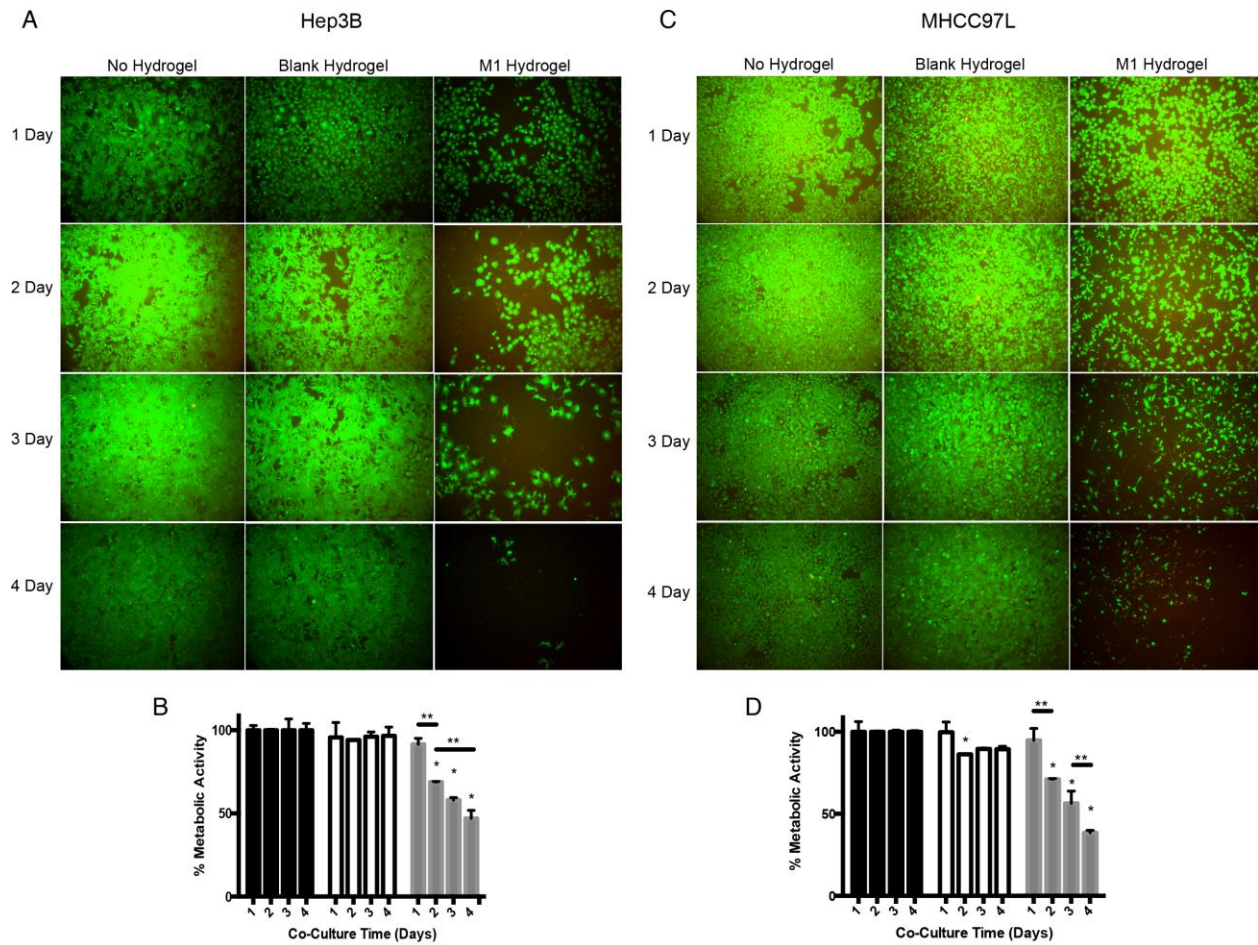

**Supplemental Figure 1.** Time dependent effect of M1 hydrogels on HCC cells (1-4 days). (A) Live/dead images and (B) normalized metabolic activity of Hep3B cells with no hydrogels (■), blank hydrogels (□), and hydrogels loaded with  $5 \times 10^5$  macrophages (■). (C) Live/dead images and (D) normalized metabolic activity of MHCC97L cells treated with no hydrogels (■), blank hydrogels (□), and hydrogels loaded with  $5 \times 10^5$  macrophages (■). \* $P < 0.05$ , \*\* $P < 0.01$ .

## Video

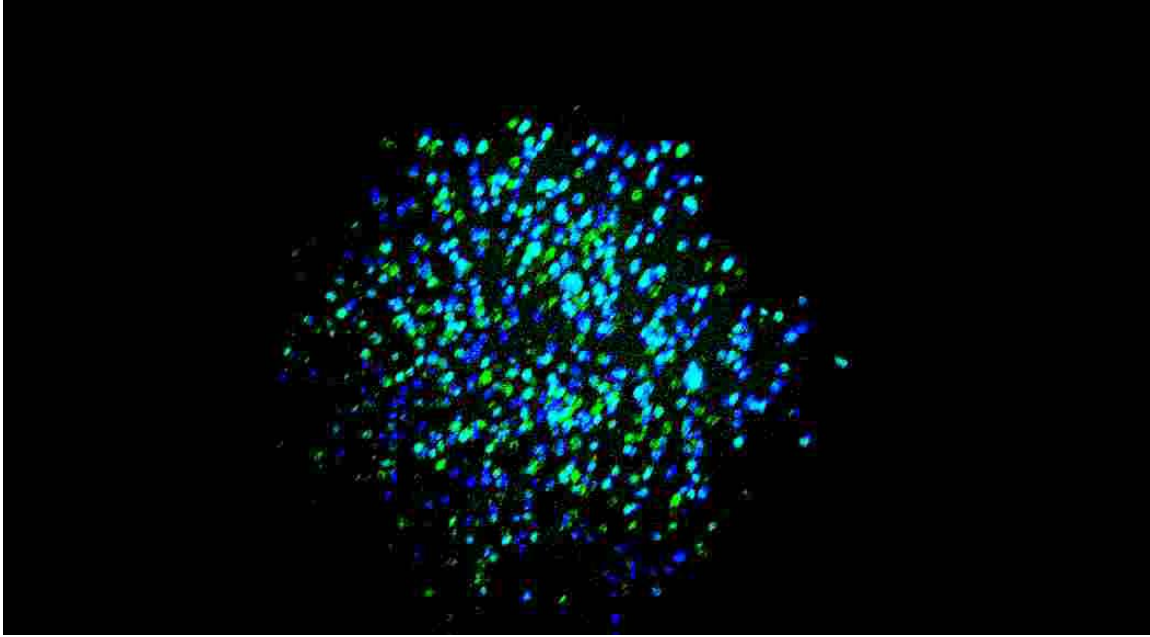

*(For the video file, please refer to the separated supplementary material)*

**Supplemental Video 1.** 3D video of a section of M1 macrophage-loaded hydrogels showing even distribution of M1 macrophages through the hydrogel positive for CD68 (green) with the nuclei stained with DAPI (blue).
